1 **Bacterial T6SS Effector EvpP Inhibits Neutrophil**  
2 **Recruitment via Jnk-Caspy Inflammasome Signaling *In vivo***

3 **Jinchao Tan,<sup>a</sup> Dahai Yang,<sup>a,c</sup> Zhuang Wang,<sup>a</sup> Xin Zheng,<sup>a</sup> Yuanxing Zhang,<sup>a,c</sup> Qin**  
4 **Liu<sup>a,b,c</sup>**

5 State Key Laboratory of Bioreactor Engineering, East China University of Science  
6 and Technology, Shanghai 200237, China <sup>a</sup>; Laboratory for Marine Biology and  
7 Biotechnology, Qingdao National Laboratory for Marine Science and Technology,  
8 Qingdao 266071, China <sup>b</sup>; Shanghai Engineering Research Center of Marine Cultured  
9 Animal Vaccines, Shanghai 200237, China <sup>c</sup>.

10 Address correspondence to Qin Liu, qinliu@ecust.edu.cn

11 **Running Title:** T6SS effector inhibits neutrophil recruitment *in vivo*

12 **ABSTRACT** The type VI secretion system (T6SS) comprises dynamic complex  
13 bacterial contractile nanomachines and is used by many bacteria to inhibit or kill other  
14 prokaryotic or eukaryotic cells. Previous studies have revealed that T6SS is  
15 constitutively active in response to various stimuli, or fires effectors into host cells  
16 during infection. It has been proposed that the T6SS effector EvpP in *Edwardsiella*  
17 *piscicida* can inhibit NLRP3 inflammasome activation via the Ca<sup>2+</sup>-dependent JNK  
18 pathways. Here, we developed an *in vivo* infection model by microinjecting bacteria  
19 into the tail vein muscle of 3-day-post-fertilized zebrafish larvae, and found that both  
20 macrophages and neutrophils are essential for bacterial clearance. Further study  
21 revealed that EvpP plays a critical role in promoting the pathogenesis of *E. piscicida*  
22 via inhibiting the phosphorylation of Jnk signaling to reduce the expression of *cxcl8a*,  
23 *mmp13* and *IL-1β* *in vivo*. Subsequently, by utilizing *Tg (mpo:eGFP<sup>+/+</sup>)* zebrafish  
24 larvae for *E. piscicida* infection, we found that the EvpP-inhibited Jnk-caspy  
25 inflammasome signaling axis significantly suppressed the recruitment of neutrophils  
26 to infection sites, and the *caspy*- or *IL-1β*-MO knockdown larvae were more  
27 susceptible to infection and failed to restrict bacterial colonization *in vivo*.

28 **IMPORTANCE** Innate immunity is regulated by phagocytic cells and is critical for  
29 host control of bacterial infection. In many bacteria, T6SSs can affect bacterial  
30 virulence in certain environments, but little is known about the mechanisms  
31 underlying T6SS regulation of innate immune responses during infection *in vivo*. Here,  
32 we investigated the role of an *E. piscicida* T6SS effector EvpP in manipulating the  
33 reaction of neutrophils *in vivo*. We show that EvpP inhibits the activation of Jnk-caspy  
34 inflammasome pathway in zebrafish larvae, and reveal that macrophages are essential  
35 for neutrophil recruitment *in vivo*. This interaction improves our understanding about  
36 the complex and contextual role of a bacterial T6SS effector in modulating the action

37 of myeloid cells during infection, and offers new insights into the warfare between  
38 bacterial weapons and host immunological surveillance.

39 **KEYWORDS** *Edwardsiella piscicida*, Jnk-caspy inflammasome pathway,  
40 neutrophil recruitment, T6SS effector

41 The bacterial type VI secretion system (T6SS) is a versatile secretion system capable  
42 of facilitating a variety of interactions with eukaryotic hosts and/or bacterial  
43 competitors (1). T6SS effectors are delivered upon cell-to-cell contact and include  
44 factors engaged in interbacterial competition and those that mediate pathogenicity in  
45 the context of eukaryotic host infections (2-5). To date, various anti-bacterial effectors  
46 have been identified that attack the bacterial cell wall, nucleases, or lipases via diverse  
47 activities, including those of muramidases and peptidases (1). There are several  
48 bacterial species that utilize the T6SS to mediate pathogenicity in eukaryotic hosts,  
49 including *Vibrio cholerae*, *Pseudomonas aeruginosa*, *Burkholderia pseudomallei*,  
50 and *Aeromonas hydrophila* in mammals, and *Edwardsiella piscicida* in fish. Although  
51 many molecular consequences of T6SS activity on eukaryotic cells have been  
52 deciphered (1), few anti-eukaryotic effectors have been identified other than the  
53 enzymatic domains found in VgrGs (2) and the phospholipase D (PLD) enzyme PldB  
54 (6). Recently, Chen *et al.* identified a non-VgrG T6SS effector, EvpP, from *E.*  
55 *piscicida*, and revealed its role in inhibiting NLRP3 inflammasome activation in  
56 macrophages. However, little is known about the physiological role of this bacterial  
57 T6SS effector in manipulating host immunity during pathogenic infection *in vivo*.

58 The zebrafish (*Danio rerio*) is a genetically and optical accessible model for  
59 infectious diseases (7-9), in which the *in vivo* innate immune responses can be studied  
60 in the context of a whole organism. Using zebrafish larvae, infectious processes can  
61 be described in detail using *in vivo* imaging techniques because of their small size and  
62 transparency during the first week after fertilization. Thus, zebrafish larvae have been  
63 used to analyze the innate immune response after bacterial infections, including  
64 *Mycobacterium marinum* (10), *Streptococcus* sp. (11), *Salmonella typhimurium* (12),  
65 *Staphylococcus aureus* (13), and *Burkholderia cenocepacia* (14). Moreover, zebrafish

66 are increasingly used to study the function of neutrophils and host pathogen  
67 interactions, and the generation of transgenic zebrafish lines with fluorescently  
68 labeled leukocytes has made it possible to visualize neutrophil responses to infection  
69 in real time (15).

70 *Edwardsiella piscicida*, previously named as *E. tarda* (16), is an intracellular  
71 bacterium with broad cellular tropism; it can infect practically all vertebrates, causing  
72 septicemia and fatal infections (17, 18). T3SS and T6SS have been identified as  
73 important components of virulence in this pathogen (19-21). Moreover, *E. piscicida*  
74 activates NLRC4 and NLRP3 inflammasomes via T3SS and inhibits the NLRP3  
75 inflammasome via EvpP (22). To date, although several infection models have been  
76 used to explore the biology of *Edwardsiella* sp. (23, 24), the events of myeloid cell  
77 responses during *E. piscicida* infection *in vivo* remain to be clarified. In this study, we  
78 established an microinjection infection model in the tail vein muscle of  
79 3-day-post-fertilized zebrafish larvae and analyzed the role of T6SS effector, EvpP, in  
80 manipulating host immune responses *in vivo*. We demonstrated that EvpP inhibits the  
81 phosphorylation of JNK-MAPK pathway, subsequently suppressing the  
82 caspy-inflammasome signaling cascades, contributing to the inhibition of neutrophils  
83 recruitment. Moreover, we found that both macrophages and neutrophils are critical  
84 for the clearance of *E. piscicida in vivo*. Collectively, this study advances our  
85 understanding of the mechanisms of the bacterial T6SS effector in regulating the  
86 action of innate immune cells during infection.

## 87 **RESULTS**

88 **Macrophages and neutrophils are critical for *E. piscicida* infection.** To  
89 analyze the functional roles of *E. piscicida* during infection *in vivo*, we determined a  
90 reproducible route of infection with rapid kinetics by tail muscle microinjection of

91 3-day-post-fertilized (dpf) larvae with the indicated doses of *E. piscicida* (Fig. 1A).  
92 As shown in Fig. 1B, *E. piscicida* microinjection-infection induced mortality in a  
93 dose-dependent manner. Mortality began at 24 h postinfection (hpi), and consistently  
94 reached 100% between 24 to 48 hpi when infected with 100 cfu/larvae. Nearly 60%  
95 of larvae succumbed when infected with 50 cfu/larvae, and ~20% larvae succumbed  
96 when infected with 10 cfu/larvae. Based on these results, we calculated the LD<sub>50</sub> of  
97 wild type *E. piscicida* as 45 cfu/larvae. To further visualize *E. piscicida* infection *in*  
98 *vivo*, we constructed mCherry-labeled *E. piscicida* strains to microinject into the tail  
99 muscle, and found that *E. piscicida* colonized at the infection site and diffused from  
100 12 to 24 hpi (Fig. 1 C and D).

101 Neutrophils and macrophages are highly motile phagocytic cells that are typically  
102 the first responders recruited to sites of tissue infection (25). Previous study has  
103 established the model to treat zebrafish larvae with 0.25 mM *pu.1* morpholino, a  
104 transcription factor essential for development of myeloid cells, which can suppress the  
105 macrophages development, while 0.5 mM *pu.1* morpholino treatment can suppress  
106 both macrophages and neutrophils development (26). In this study, in order to  
107 characterize further the nature of myeloid cell interaction with *E. piscicida*, we first  
108 microinjected 0.25 mM *pu.1* morpholino into embryos, to inhibit the formation of  
109 macrophages in *Tg (mpo:eGFP<sup>+/+</sup>)* zebrafish larvae (Fig. 1E). Interestingly, we found  
110 a comparatively higher mortality in *pu.1* knockdown zebrafish larva following  
111 infection with *E. piscicida* (Fig. 1F). Moreover, the bacterial burdens were also  
112 comparatively enhanced in 0.25 mM *pu.1* knockdown zebrafish larva (Fig. 1G),  
113 which suggesting that macrophages are important for the prevention of *E. piscicida*  
114 proliferation. Moreover, we microinjected 0.5 mM *pu.1* morpholino into embryos, to  
115 inhibit the formation of both macrophages and neutrophils in *Tg (mpo:eGFP<sup>+/+</sup>)*

116 zebrafish larvae, then infected with *E. piscicida*, we found a significantly higher  
117 mortality and bacteria burden in both macrophages and neutrophils depletion larva  
118 (Fig. 1E), strongly suggests that both macrophages and neutrophils are essential for  
119 the prevention of *E. piscicida* proliferation.

120 **EvpP inhibits neutrophils recruitment to promote *E. piscicida* infection in**  
121 ***vivo*.** To characterize the effects of EvpP on the virulence of *E. piscicida*, we  
122 microinjected the LD<sub>50</sub> dose of wild type,  $\Delta evpP$ , and *evpP*-complemented  
123 ( $\Delta evpP::pevpP$ ) *E. piscicida* strains *in vivo*, and monitored the survival and pathogen  
124 loads, respectively. We found that the *evpP* mutant strain showed significant  
125 attenuation ( $p=0.0248$ ), and the virulence was restored to the same magnitude as that  
126 of the wild type in the *evpP*-complemented strain (Fig. 2A). Consistent with the  
127 attenuated virulence observed in  $\Delta evpP$  strain, the bacterial burdens were significantly  
128 reduced in the infected larvae (Fig. 2B). Interestingly, by utilizing the tail muscle  
129 microinjection infection model in *Tg (mpo:eGFP<sup>+/+</sup>)* zebrafish larvae with the  
130 indicated mCherry-labeled *E. piscicida* strains to establish a direct methods to  
131 analysis of leukocyte response to a compartmentalized infection (27, 28), we found  
132 that neutrophils were significantly recruited to the  $\Delta evpP$  *E. piscicida* infection sites,  
133 compared with the wild type or *evpP*-complemented *E. piscicida* infection groups  
134 (Fig. 2C and D), which suggest that the bacterial T6SS effector EvpP was critical for  
135 inhibiting neutrophils recruitment during infection *in vivo*.

136 **EvpP inhibits neutrophils recruitment via Jnk-MAPK signaling *in vivo*.** It  
137 has been reported that EvpP may inhibit the phosphorylation of JNK-MAPK signaling  
138 during *E. piscicida* infection in mammalian macrophages (22). First, we confirmed  
139 that activation of JNK was enhanced in  $\Delta evpP$ -infected zebrafish fibroblasts (ZF4),  
140 compared to cells infected with the wild type or *evpP*-complemented *E. piscicida*

141 strains (Fig. S1A). Furthermore, we examined the effects of EvpP on the regulation of  
142 JNK-MAPK during bacterial infection *in vivo*. When we infected zebrafish larvae  
143 with the indicated *E. piscicida* strains, consistent with the *in vitro* infection  
144 experiments, activation of JNK was enhanced in  $\Delta evpP$ -infected larvae, compared to  
145 larvae infected with the wild type or *evpP*-complemented *E. piscicida* (Fig. 3A).  
146 These results indicate EvpP-mediated manipulation of JNK-MAPK signaling *in vivo*.

147 Since MAPK signaling cascades regulate the transcriptional activation of a wide  
148 array of proinflammatory and chemokine genes (29, 30), we further assessed the  
149 expression of chemokines in both ZF4 cells and zebrafish larvae infected with wild  
150 type and mutant *E. piscicida*. Infection with wild type *E. piscicida* induced the  
151 expression of *cxcl8a* and *mmp13* transcripts, which was further enhanced in zebrafish  
152 infected with  $\Delta evpP$  *E. piscicida* (Fig. 3B and C). The enhancement of chemokine  
153 expression observed with the EvpP mutant was abolished when ZF4 cells or zebrafish  
154 larvae were infected with the *evpP*-complemented *E. piscicida* (Fig. 3B and C).  
155 Collectively, these results indicate that EvpP regulates *cxcl8a* and *mmp13* expression  
156 by inhibiting JNK-MAPK signaling cascades.

157 To further assess the role of JNK signaling cascade activation in response to *E.*  
158 *piscicida* infection *in vivo*, we utilized the specific JNK inhibitor SP600125 to pretreat  
159 the cells or larvae (30, 31), and found that  $\Delta evpP$ -infection-induced JNK  
160 phosphorylation was restored to comparative levels both in infected ZF4 cells and  
161 zebrafish larvae groups (Fig. S1A; Fig. 3A). Moreover, SP600125 treatment also  
162 inhibited  $\Delta evpP$ -infection enhanced *cxcl8a* and *mmp13* expression (Fig. S1B and C;  
163 Fig. 3B and C). Thus, we infected zebrafish with  $\Delta evpP$  with or without SP600125  
164 treatment and monitored the survival and bacterial burden after infection. SP600125  
165 treatment resulted in significant mortality (Fig. 3D), and consistently higher levels of



166 bacterial colonization were detected in SP600125-treated zebrafish larvae (Fig. 3E).  
167 Taken together, these results indicate that activation of JNK-MAPK signaling plays a  
168 critical role in *E. piscicida* clearance.

169 In zebrafish, *cxcl8a* and *mmp3* are known to be the most potent chemoattractants,  
170 which are responsible for guiding neutrophils through the tissue matrix until they  
171 reach sites of injury or infection (31). In this study, we showed that both *cxcl8a* and  
172 *mmp13* genes were upregulated in response to  $\Delta evpP$  *E. piscicida* infection, but the *in*  
173 *vivo* function of EvpP on the migratory behavior of neutrophils during infection  
174 remains to be clarified. Here, we found the  $\Delta evpP$  *E. piscicida* infection-induced  
175 recruitment of neutrophils was restored when the zebrafish larvae were pretreated  
176 with the specific JNK inhibitor SP600125, which indicates that JNK-MAPK signaling  
177 activation plays a critical role in neutrophil immigration (Fig. 3F). Collectively, these  
178 results indicate that EvpP plays a critical role in inhibiting the recruitment of  
179 neutrophils through the Jnk-MAPK signaling cascade, promoting the bacterial  
180 colonization *in vivo*.

181 **EvpP inhibits neutrophils recruitment through Jnk-caspy-inflammasome**  
182 **cascades *in vivo*.** Recently, we have reported that EvpP could inhibit the  
183 phosphorylation of Jnk-MAPK to suppress the inflammasome activation during *E.*  
184 *piscicida* infection in mammalian macrophages (22). Thus, to further clarify the  
185 downstream signaling of EvpP-regulated Jnk-MAPK activation *in vivo*, we first  
186 analyzed the expression of IL-1 $\beta$  during indicated *E. piscicida* infection. Infection  
187 with wild type *E. piscicida* induced the expression of *IL-1 $\beta$*  transcripts, which was  
188 further enhanced in zebrafish larvae infected with  $\Delta evpP$  *E. piscicida* (Fig. 4A). while  
189 the enhancement of cytokine expression observed with the EvpP mutant was  
190 abolished in zebrafish larvae when infected with the *evpP*-complemented *E. piscicida*

191 (Fig. 4A). Furthermore, to analysis the relative caspase-1 activity in zebrafish larvae  
192 infected with indicated *E. piscicida* strains, consistently, we found a comparatively  
193 increased activation of caspase-1 in zebrafish larvae infected with  $\Delta evpP$  *E. piscicida*  
194 (Fig. 4B). However, when we pretreated the larva with a specific JNK inhibitor  
195 SP600125, we found the  $\Delta evpP$  *E. piscicida* infection-induced *IL-1 $\beta$*  expression and  
196 caspase-1 activity was impaired (Fig. 4A and B), which indicates that EvpP-regulated  
197 Jnk-MAPK signaling activation plays a critical role in regulating the downstream  
198 inflammasome activation *in vivo*.

199 To further analysis the role of inflammasome in regulating neutrophils  
200 recruitment, specific caspy (the caspase-1 homolog) or *IL-1 $\beta$*  morpholino was  
201 microinjected into *Tg (mpo:eGFP<sup>+/+</sup>)* zebrafish larvae embryo, then infected with  
202 indicated *E. piscicida* strains. We found the  $\Delta evpP$  *E. piscicida* infection-induced  
203 recruitment of neutrophils was comparatively decreased in both *caspy*- and *IL-1 $\beta$* -MO  
204 zebrafish larvae (Fig. 4C), which indicates that the inflammasome signaling activation  
205 contribute to the regulation of neutrophil immigration. Moreover, we found a  
206 significantly higher mortality in either *caspy*- or *IL-1 $\beta$* -MO zebrafish larvae, and  
207 consistently, the bacterial burdens were also comparatively enhanced in either *caspy*-  
208 or *IL-1 $\beta$* -MO zebrafish larvae (Fig. 4D-G). Taken together, these results suggest that  
209 EvpP could regulate zebrafish larvae Jnk-caspy inflammasome pathways activation,  
210 which not only plays critical role in inhibiting neutrophil recruitment, but also  
211 highlights the essential role of myeloid cells in response to *E. piscicida* infection *in*  
212 *vivo*.

## 213 **DISCUSSION**

214 The progression of infectious disease is determined by dynamic and complex  
215 interactions between host defense systems and pathogen virulence factors (32).

216 Pathogenic bacteria encode protein secretion systems that promote invasion of the  
217 host's immune response, thwarting of microbial competitors, and ultimately survival  
218 within the host (32). There has been increasing use of zebrafish larvae to study  
219 infectious disease, as their optical accessibility and potential for genetic manipulation  
220 allows for the visualization of the immune response to infection inside a living intact  
221 vertebrate host. For example, injection of *Salmonella enterica serovar* Typhimurium  
222 into zebrafish has been key for the discovery of novel concepts in cellular immunity,  
223 immunometabolism, and emergency granulopoiesis (33, 34). Recent work has  
224 established zebrafish as a model for foodborne enterohaemorrhagic *E. coli* (EHEC)  
225 infection, a major cause of diarrheal illness in humans (35). Using the protozoan  
226 *Paramecium caudatum* as a vehicle for EHEC delivery, research has shown that  
227 zebrafish larvae can be used to study the hallmarks of human EHEC infection,  
228 including EHEC-phagocyte interactions in the gut and bacterial transmission to naive  
229 hosts (36). In the case of *Shigella*, caudal vein infection of zebrafish was first  
230 developed to study *Shigella*-phagocyte interactions and bacterial autophagy *in vivo*  
231 (36). In a previous study, we uncovered the mechanism underlying the inhibition by  
232 EvpP of Jnk-MAPK pathways, which results in the inhibition of NLRP3  
233 inflammasome activation in mammalian macrophages, thus providing critical insight  
234 into this delicate interaction (22). Moreover, during *E. piscicida* infection, it can  
235 replicate in a specific vesicle to activate pyroptosis and releases them to the  
236 extracellular space (37), but the mechanism of this bacteria arms its virulence effector  
237 to resistant the host immune responses *in vivo* remain unknown. Furthermore,  
238 intracellular pathogens that replicate within macrophages, such as *S. typhimurium*,  
239 must effectively evade pyroptosis in order to stay within an infected cell. Otherwise,  
240 detection by the inflammasome activates caspase-1 and triggers pyroptosis, which

241 releases the pathogen to the extracellular space (38), however, the mechanism of  
242 bacterial resistance to neutrophil killing remains unknown. Thus, it is necessary to  
243 take these advantages to clarify the complexity between macrophages and neutrophils  
244 that is regulated by bacterial virulence effectors, and further clarify programmed cell  
245 death induced by bacterial infection that shapes innate immune responses *in vivo*. In  
246 this study, our results advance the understanding of bacterial T6SS effector EvpP in  
247 inhibiting the neutrophil recruitment through Jnk-caspy inflammasome cascades  
248 activation *in vivo* (Fig. 5).

249 Neutrophils are the most abundant cellular component of the host immune system  
250 and are a primary constituent of the innate immune response to invading  
251 microorganisms (25). Neutrophil recruitment to areas of inflammation is considered  
252 to be the result of the concerted action of several chemoattractants, including not only  
253 cytokines, such as IL-1 $\beta$ , but also chemokines, such as cxcl8a (also known as IL-8) or  
254 enzymes such as mmp13 (30, 31). These molecules are consistently among the first  
255 signals to be expressed and released by the various cell types involved in  
256 inflammation (39). Since the genetic tools in zebrafish allow for the generation of  
257 transgenic lines with fluorescently labeled cell populations, including neutrophils and  
258 macrophages, recent advances in the use of zebrafish to study neutrophils during  
259 host-pathogen interactions have been used for mammalian-derived bacteria (31, 40).  
260 In addition, the roles of cxcl8 and mmp13 in neutrophil response to tissue injury have  
261 been clarified through studies in zebrafish larvae (30, 31). However, it is critical to  
262 clarify the importance of neutrophils in host defense against bacterial infection. Here,  
263 our results not only confirmed an important function of both macrophages and  
264 neutrophils in response to *E. piscicida* infection, but also bifurcates the model to  
265 analysis the role of inflammasome activation in regulating neutrophils recruitment

266 during infection, and directly linked the zebrafish caspy-inflammasome activation and  
267 neutrophil killing once the pathogen is exposed.

268 Taken together, this study reveals the first functional characterization of  
269 neutrophil migration by a pathogenic T6SS effector in zebrafish larvae, which will  
270 shed light on further analysis of the complex and contextual role of bacterial T6SS  
271 effectors in modulating the function of macrophages and neutrophils *in vivo*, and  
272 offers new insights into the warfare between bacterial weapons and host innate  
273 immunological surveillance.

274

## 275 **MATERIALS AND METHODS**

276 **Strains and media.** *E. piscicida* strains are listed in Table S1, and were grown at  
277 30°C in tryptic soy broth (TSB) supplemented with antibiotics as appropriate at the  
278 following concentrations: colistin (Col), 16.7 µg/ml; ampicillin (Amp), 100 µg/ml.

279 **Zebrafish strains and maintenance.** Zebrafish were obtained from the China  
280 Zebrafish Resource Center (CZRC; Wuhan, China). The *Tg (mpo:eGFP<sup>+/+</sup>)* line has  
281 been previously described (41). Embryos were incubated in E3 medium (5 mM NaCl,  
282 0.17 mM KCl, 0.33 mM CaCl<sub>2</sub>, and 0.33 mM MgSO<sub>4</sub>) containing 0.3 µg/ml  
283 methylene blue at 28°C. Experiments were conducted according to protocols  
284 approved by the Animal Care Committee, East China University of Science and  
285 Technology, Shanghai, China (No. 2006272).

286 **Infection of *E. piscicida* by microinjection into zebrafish larvae.** Bacteria were  
287 grown on TSB plates overnight at 30°C, and single colonies of each strain were  
288 inoculated into 5 ml TSB supplemented with appropriate antibiotics, grown overnight  
289 at 30°C with shaking at 200 rpm, subcultured 1:100 in the same medium, and grown  
290 for 4 h without shaking at 30°C to log phase. Then, 1 ml of culture was centrifuged at  
291 4,500× g for 10 min to pellet bacteria, and the supernatant was discarded. The  
292 bacterial pellet was resuspended in 1 ml sterile PBS, the OD<sub>600</sub> was measured, and the  
293 suspension was diluted to the appropriate concentrations.

294 Three-dpf zebrafish larvae were mechanically dechorionated and anaesthetized  
295 by immersion in 0.02% w/v buffered tricaine (MS-222, Sigma-Aldrich, St. Louis,  
296 MO). Embryos were embedded in 2.5% w/v agarose plates and injected individually  
297 using pulled glass microcapillary pipettes filled with the appropriate dilution of  
298 bacterial suspension. Aliquots of 1 nl of bacterial suspension were microinjected into  
299 tail vein muscle. Injections were performed using pulled borosilicate glass

300 microcapillary injection needles (Sutter Health, Sacramento, CA) and a Milli-Pulse  
301 Pressure Injector (Applied Scientific Instrumentation, Eugene, OR). After injection,  
302 larvae were placed in petri dishes with E3 medium. The infected larvae were analyzed  
303 to detect survival rate, bacterial burden, phosphorylation of JNK *in vivo*, and  
304 transcription of cytokines.

305 For treatment with inhibitors, zebrafish larvae were preincubated 1 h before  
306 infection with 50  $\mu$ M SP600125 (Selleck Chemicals, Boston, MA) in E3 medium, or  
307 DMSO (Life Technologies, Carlsbad, CA) as a control. The embryos were maintained  
308 in this solution after fin transection over the entire course of the experiment.

309 For larvae mortality during infection, each indicated bacterial strain was injected  
310 into 60 embryos. Following infection, larvae were observed every 24 h, up to 120 hpi,  
311 dead embryos were removed, and numbers were recorded at each time point.

312 For the bacterial burden analysis in infected larvae, 5 zebrafish larvae for each  
313 bacterial strain group were transferred individually into a sterile 1.5 ml tube  
314 containing 200  $\mu$ l lysis buffer (1% Triton X-100, Sangon Biotech Co. Ltd., Shanghai,  
315 China) and mechanically homogenized on ice. The homogenates were serially diluted  
316 and plated onto solid TSB medium to count the bacterial numbers within infected  
317 larvae.

318 **ZF4 cell cultures and infection assays.** ZF4 cells (ATCC CRL-2050<sup>TM</sup>, CZRC),  
319 established from 1-day-old zebrafish embryos, were cultured in growth medium (GM)  
320 consisting of DMEM/F12 (Life Technologies) supplemented with 10% fetal bovine  
321 serum (FBS) and seeded in flat bottom 24-well plates (Corning Inc., Corning, NY) at  
322 a density of  $2 \times 10^5$  cells per well and cultured overnight. Before infection, the culture  
323 medium was changed to serum-free DMEM/F12 medium (SFM) for 12–16 h. ZF4  
324 was infected at a multiplicity of infection (MOI) of 50, and the bacteria were

325 centrifuged onto cells at 600× g for 10 min. For pharmacological pretreatment, the  
326 cells were preincubated with SP600125 1 h before infection. The infected cells were  
327 detected by immunoblotting and RT-PCR.

328 **Western blot analysis.** Fifty 12-hpi larvae per group were transferred to a 1.5 ml  
329 tube. Larvae were homogenized in lysis buffer (20 mM Tris-HCl (pH 7.4), 150 mM  
330 NaCl, 5 mM EDTA, 10% glycerol, and 0.1% Triton X-100) containing protease  
331 inhibitor cocktail and phosphatase inhibitor (Roche Applied Science, Penzberg,  
332 Germany). Protein lysates were obtained by organic solvent precipitation method,  
333 protein precipitate was mixed with protein loading buffer, boiled for 10 min and  
334 centrifuged (12,000 rpm, 5 min). Protein lysates (10 µl) were separated by  
335 SDS-PAGE and transferred to a PVDF membrane (Millipore Sigma, Burlington, MA).  
336 The membranes were blocked in 5% w/v nonfat dry milk in TBST. Signals were  
337 detected with mouse anti-actin antibody (Ab) (1/5000, Sigma-Aldrich), rabbit  
338 anti-phospho-JNK kinases (1/1,000, Cell Signaling Technology, Danvers, MA), and  
339 rabbit anti-JNK (1/1,000, Cell Signaling Technology) overnight at 4°C, followed by  
340 incubation with the appropriate secondary HRP-conjugated-anti-rabbit Abs (1/2,000,  
341 Beyotime Biotechnology, Shanghai, China) and detection with ECL (Cell Signaling  
342 Technology). The signal intensities were quantitatively analyzed using NIH ImageJ.

343 **Quantitative Real-Time PCR analysis.** The expression of *cxcl8a* and *mmp13*  
344 was evaluated by quantitative real-time RT-PCR of zebrafish larvae and ZF4 cells.  
345 Ten infected larvae of each group were sampled at 6 hpi and 12 hpi, and total RNA  
346 was isolated using the TRIzol reagent (Life Technologies), treated with DNase I  
347 (Promega, Madison, WI) to digest residual genomic DNA, and reverse transcribed  
348 using the PrimeScript RT reagent kit (TaKaRa Bio Inc., Kusatsu, Japan). Quantitative  
349 RT-PCR was performed using an ABI 7500 Real-Time PCR System (Applied



350 Biosystems, Foster City, CA). Expression of each gene was expressed as the fold  
351 change relative to the expression in the PBS control group.

352 **Microscopic analysis.** To observe recruitment of neutrophils and colonization of  
353 bacteria, 3-dpf *Tg(mpo:eGFP<sup>+/+</sup>)* zebrafish larvae were injected with 1 nl fluorescent  
354 bacterial suspension (1 nl of bacterial suspension containing 200 cfu/nl) in the tail  
355 vein muscle. At 6 hpi and 12 hpi, images were acquired by a Leica DMI3000B  
356 inverted fluorescence microscope (Leica Camera AG, Wetzlar, Germany) to observe  
357 the recruitment of neutrophils to the infection site and the colonization of bacteria.

358 **Microinjection of morpholino nucleotides into zebrafish zygotes.** One-cell  
359 stage *Tg(mpo:eGFP<sup>+/+</sup>)* zebrafish zygotes were microinjected with 1 nl morpholino  
360 (Gene Tools, LLC, Philomath, OR) in yolk sac. Accordingly, 0.25 mM *pu.1*  
361 morpholino for knockdown of macrophages, 0.5 mM *pu.1* morpholino for full  
362 knockdown of macrophages and neutrophils (42), 0.75 mM *caspy* morpholino for  
363 caspy knockdown (43), 1 mM *IL-1 $\beta$*  morpholino for IL-1 $\beta$  knockdown (44). Green  
364 fluorescence was observed to confirm the knockdown of neutrophils.  
365 Morpholino-treated larvae were then infected as described above.

366 **Caspase-1 activity assays.** The caspase-1 activity was determined with the  
367 fluorometric substrate Z-YVAD 7-Amino-4-trifluoromethylcoumarin (Z-YVAD-AFC,  
368 caspase-1 substrate VI, calbiochem) as described previously (45). In brief, 25-35  
369 larvae were lysed in hypotonic cell lysis buffer (25 mM 4-(2-hydroxyethyl)  
370 piperazine-1-ethanesulfonic acid, 5 mM dithionthreitol, 1:20 protease inhibitor  
371 cocktail (Sigma-Aldrich), pH 7.5) on ice for 10 min. For each reaction, 10  $\mu$ g protein  
372 were incubated for 90 min at 23°C with 50  $\mu$ M YVAD-AFC and 50  $\mu$ l of reaction  
373 buffer (0.2% 3-[(3-cholamidopropyl) dimethylammonio]-1-propanesulfonate  
374 (CHAPS), 0.2 M 4-(2-hydroxyethyl) piperazine-1-ethanesulfonic acid, 20% sucrose,

375 29 mM dithiothreitol, pH 7.5). After the incubation, the fluorescence of the AFC  
376 released from the Z-YVAD-AFC substrate was measured using a SpectraMax M5  
377 fluorescent plate reader (Molecular Devices) with an excitation wavelength of 405 nm  
378 and an emission wavelength of 492 nm.

379 **Statistical Analysis.** Statistical analysis was performed using Graphpad Prism  
380 (GraphPad Software Inc., La Jolla, CA). All data are representative of at least 3  
381 independent experiments and are presented as the mean  $\pm$  standard deviation (SD).  
382 Differences between 2 groups were evaluated using Student's *t* test. One-way ANOVA  
383 test was used to analyze differences among multiple groups. Differences in fish  
384 survival were assessed using the log-rank (Mantel-Cox) test. Statistical significance  
385 was defined as \*  $p < 0.05$ .

386

387 **ACKNOWLEDGEMENTS**

388 This work was supported by the National Natural Science Foundation of China  
389 No. 31472308, 31622059 (Q.L.) and the Fundamental Research Funds for the Central  
390 Universities No. 222201714022 (D.Y.). Dahai Yang was supported by the Young Elite  
391 Scientists Sponsorship Program by CAST No. 2016QNRC001, Shanghai Pujiang  
392 Program No.16PJD020, Shanghai Chenguang Program No.16CG33, and the Talent  
393 Program of the School of Biotechnology of the East China University of Science and  
394 Technology, Shanghai, China.

395 **AUTHOR CONTRIBUTIONS**

396 Q.L., and D.Y. conceived the study; J.T. conducted the majority of experiments  
397 with help from X.Z. and Z.W.; Y.Z. provided expert advice and critical review of the  
398 manuscript. D.Y., Q.L. and J.T. wrote the manuscript; all authors discussed the results  
399 and commented on the manuscript.

400 **COMPETING FINANCIAL INTERESTS**

401 The authors declare no competing financial interests.

402 **ORCID**

403 Dahai Yang, <http://orcid.org/0000-0001-6602-8653>

404 Qin Liu, <https://orcid.org/0000-0002-5465-1189>

## 405 REFERENCES

- 406 1. Durand E, Cambillau C, Cascales E, Journet L. 2014. VgrG, Tae, Tle, and beyond: the versatile  
407 arsenal of type VI secretion effectors. *Trends Microbiol* 22:498-507.
- 408 2. Ma AT, McAuley S, Pukatzki S, Mekalanos JJ. 2009. Translocation of a *Vibrio cholerae* type VI  
409 secretion effector requires bacterial endocytosis by host cells. *Cell Host Microbe* 5:234-243.
- 410 3. Schwarz S, Singh P, Robertson JD, LeRoux M, Skerrett SJ, Goodlett DR, West TE, Mougous JD.  
411 2014. VgrG-5 is a Burkholderia type VI secretion system-exported protein required for  
412 multinucleated giant cell formation and virulence. *Infect Immun* 82:1445-1452.
- 413 4. MacIntyre DL, Miyata ST, Kitaoka M, Pukatzki S. 2010. The *Vibrio cholerae* type VI secretion  
414 system displays antimicrobial properties. *Proc Natl Acad Sci U S A* 107:19520-19524.
- 415 5. Murdoch SL, Trunk K, English G, Fritsch MJ, Pourkarimi E, Coulthurst SJ. 2011. The  
416 opportunistic pathogen *Serratia marcescens* utilizes type VI secretion to target bacterial  
417 competitors. *J Bacteriol* 193:6057-6069.
- 418 6. Jiang F, Waterfield NR, Yang J, Yang G, Jin Q. 2014. A *Pseudomonas aeruginosa* type VI  
419 secretion phospholipase D effector targets both prokaryotic and eukaryotic cells. *Cell Host*  
420 *Microbe* 15:600-610.
- 421 7. Renshaw SA, Trede NS. 2012. A model 450 million years in the making: zebrafish and vertebrate  
422 immunity. *Dis Model Mech* 5:38-47.
- 423 8. van der Vaart M, Spaink HP, Meijer AH. 2012. Pathogen recognition and activation of the innate  
424 immune response in zebrafish. *Adv Hematol* 2012:159807.
- 425 9. Torraca V, Masud S, Spaink HP, Meijer AH. 2014. Macrophage-pathogen interactions in  
426 infectious diseases: new therapeutic insights from the zebrafish host model. *Dis Model Mech*  
427 7:785-797.
- 428 10. Meijer AH. 2016. Protection and pathology in TB: learning from the zebrafish model. *Semin*  
429 *Immunopathol* 38:261-273.
- 430 11. Neely MN, Pfeifer JD, Caparon M. 2002. Streptococcus-zebrafish model of bacterial  
431 pathogenesis. *Infect Immun* 70:3904-3914.
- 432 12. van der Sar AM, Musters RJ, van Eeden FJ, Appelmelk BJ, Vandenbroucke-Grauls CM, Bitter W.  
433 2003. Zebrafish embryos as a model host for the real time analysis of *Salmonella typhimurium*  
434 infections. *Cell Microbiol* 5:601-611.
- 435 13. Benard EL, van der Sar AM, Ellett F, Lieschke GJ, Spaink HP, Meijer AH. 2012. Infection of  
436 zebrafish embryos with intracellular bacterial pathogens. *J Vis Exp* 15:e3781-e378.
- 437 14. Mesureur J, Vergunst AC. 2014. Zebrafish embryos as a model to study bacterial virulence.  
438 *Methods Mol Biol* 1197:41-66.
- 439 15. Meijer AH, van der Vaart M, Spaink HP. 2014. Real-time imaging and genetic dissection of  
440 host-microbe interactions in zebrafish. *Cell Microbiol* 16:39-49.
- 441 16. Bujan N, Mohammed H, Balboa S, Romalde JL, Toranzo AE, Arias CR, Magarinos B. 2018.  
442 Genetic studies to re-affiliate *Edwardsiella tarda* fish isolates to *Edwardsiella piscicida* and  
443 *Edwardsiella anguillarum* species. *Syst Appl Microbiol* 41:30-37.
- 444 17. Janda JM, Abbott SL. 1993. Infections associated with the genus *Edwardsiella*: the role of  
445 *Edwardsiella tarda* in human disease. *Clin Infect Dis* 17:742-748.
- 446 18. Thune RL, Stanley LA, Cooper RK. 1993. Pathogenesis of gram-negative bacterial infections in  
447 warmwater fish. *Ann Rev Fish Dis* 3:37-68.
- 448 19. Rao PS, Yamada Y, Tan YP, Leung KY. 2004. Use of proteomics to identify novel virulence

- 449 determinants that are required for *Edwardsiella tarda* pathogenesis. *Mol Microbiol* 53:573-586.
- 450 20. Tan YP, Zheng J, Tung SL, Rosenshine I, Leung KY. 2005. Role of type III secretion in  
451 *Edwardsiella tarda* virulence. *Microbiology* 151:2301-2313.
- 452 21. Zheng J, Leung KY. 2007. Dissection of a type VI secretion system in *Edwardsiella tarda*. *Mol*  
453 *Microbiol* 66:1192-1206.
- 454 22. Chen H, Yang DH, Han FJ, Tan JC, Zhang LZ, Xiao JF, Zhang YX, Liu Q. 2017. The bacterial  
455 T6SS effector EvpP prevents NLRP3 inflammasome activation by inhibiting the  
456 Ca(2+)-dependent MAPK-Jnk pathway. *Cell Host Microbe* 21:47-58.
- 457 23. van Soest JJ, Stockhammer OW, Ordas A, Bloemberg GV, Spaink HP, Meijer AH. 2011.  
458 Comparison of static immersion and intravenous injection systems for exposure of zebrafish  
459 embryos to the natural pathogen *Edwardsiella tarda*. *BMC Immunol* 12:58.
- 460 24. Liu XH, Chang XY, Wu HZ, Xiao JF, Gao Y, Zhang YX. 2014. Role of intestinal inflammation in  
461 predisposition of *Edwardsiella tarda* infection in zebrafish (*Danio rerio*). *Fish Shellfish Immunol*  
462 41:271-278.
- 463 25. Li L, Yan B, Shi YQ, Zhang WQ, Wen ZL. 2012. Live imaging reveals differing roles of  
464 macrophages and neutrophils during zebrafish tail fin regeneration. *J Biol Chem*  
465 287:25353-25360.
- 466 26. Klemsz MJ, McKercher SR, Celada A, van Beveren C, Maki RA. 1990. The macrophage and B  
467 cell-specific transcription factor PU.1 is related to the ets oncogene. *Cell* 61:113-124.
- 468 27. Le Guyader D, Redd MJ, Colucci-Guyon E, Murayama E, Kissa K, Briolat V, Mordelet E, Zapata  
469 A, Shinomiya H, Herbomel P. 2008. Origins and unconventional behavior of neutrophils in  
470 developing zebrafish. *Blood* 111:132-141.
- 471 28. Herbomel P, Thisse B, Thisse C. 1999. Ontogeny and behaviour of early macrophages in the  
472 zebrafish embryo. *Development* 126:3735-3745.
- 473 29. Walz A, Peveri P, Aschauer H, Baggiolini M. 1987. Purification and amino acid sequencing of  
474 NAF, a novel neutrophil-activating factor produced by monocytes. *Biochem Biophys Res*  
475 *Commun* 149:755-761.
- 476 30. Zhang Y, Bai XT, Zhu KY, Jin Y, Deng M, Le HY, Fu YF, Chen Y, Zhu J, Look AT, Kanki J, Chen  
477 Z, Chen SJ, Liu TX. 2008. In vivo interstitial migration of primitive macrophages mediated by  
478 JNK-matrix metalloproteinase 13 signaling in response to acute injury. *J Immunol*  
479 181:2155-2164.
- 480 31. de Oliveira S, Boudinot P, Calado A, Mulero V. 2015. Duox1-derived H<sub>2</sub>O<sub>2</sub> modulates Cxcl8  
481 expression and neutrophil recruitment via JNK/c-JUN/AP-1 signaling and chromatin  
482 modifications. *J Immunol* 194:1523-1533.
- 483 32. Kotewicz KM, Ramabhadran V, Sjoblom N, Vogel JP, Haenssler E, Zhang M, Behringer J, Scheck  
484 RA, Isberg RR. 2017. A single legionella effector catalyzes a multistep ubiquitination pathway to  
485 rearrange tubular endoplasmic reticulum for replication. *Cell Host Microbe* 21:169-181.
- 486 33. Wu SY, Wang LD, Li JL, Xu GM, He ML, Li YY, Huang R. 2016. *Salmonella* spv locus  
487 suppresses host innate immune responses to bacterial infection. *Fish Shellfish Immunol*  
488 58:387-396.
- 489 34. Varas M, Ortiz-Severin J, Marcoleta AE, Diaz-Pascual F, Allende ML, Santiviago CA, Chavez FP.  
490 2017. *Salmonella Typhimurium* induces cloacitis-like symptoms in zebrafish larvae. *Microb*  
491 *Pathog* 107:317-320.
- 492 35. Stones DH, Fehr AGJ, Thompson L, Rocha J, Perez-Soto N, Madhavan VTP, Voelz K, Krachler

- 493 AM. 2017. Zebrafish (*Danio rerio*) as a vertebrate model host to study colonization, pathogenesis,  
494 and transmission of foodborne *Escherichia coli* O157. *mSphere* 2:e00365-17.
- 495 36. Mostowy S, Boucontet L, Mazon Moya MJ, Sirianni A, Boudinot P, Hollinshead M, Cossart P,  
496 Herbomel P, Levraud JP, Colucci-Guyon E. 2013. The zebrafish as a new model for the *in vivo*  
497 study of *Shigella flexneri* interaction with phagocytes and bacterial autophagy. *PLoS Pathog*  
498 9:e1003588.
- 499 37. Zhang LZ, Ni CS, Xu WT, Dai TC, Yang DH, Wang QY, Zhang YX, Liu Q. 2016.  
500 Intramacrophage infection reinforces the virulence of *Edwardsiella tarda*. *J Bacteriol*  
501 198:1534-1542.
- 502 38. Miao EA, Leaf IA, Treuting PM, Mao DP, Dors M, Sarkar A, Warren SE, Wewers MD, Aderem A.  
503 2010. Caspase-1-induced pyroptosis is an innate immune effector mechanism against intracellular  
504 bacteria. *Nat Immunol* 11:1136-1142.
- 505 39. Tecchio C, Cassatella MA. 2016. Neutrophil-derived chemokines on the road to immunity. *Semin*  
506 *Immunol* 28:119-128.
- 507 40. Zuniga-Traslavina C, Bravo K, Reyes AE, Feijoo CG. 2017. Cxcl8b and Cxcr2 regulate  
508 neutrophil migration through bloodstream in zebrafish. *J Immunol Res* 2017:6530531.
- 509 41. Renshaw SA, Loynes CA, Trushell DM, Elworthy S, Ingham PW, Whyte MK. 2006. A transgenic  
510 zebrafish model of neutrophilic inflammation. *Blood* 108:3976-3978.
- 511 42. Rhodes J, Hagen A, Hsu K, Deng M, Liu TX, Look AT, Kanki JP. 2005. Interplay of pu.1 and  
512 gata1 determines myelo-erythroid progenitor cell fate in zebrafish. *Dev Cell* 8:97-108.
- 513 43. Masumoto J, Zhou W, Chen FF, Su F, Kuwada JY, Hidaka E, Katsuyama T, Sagara J, Taniguchi S,  
514 Ngo-Hazelett P, Postlethwait JH, Nunez G, Inohara N. 2003. Caspy, a zebrafish caspase, activated  
515 by ASC oligomerization is required for pharyngeal arch development. *J Biol Chem*  
516 278:4268-4276.
- 517 44. Yan B, Han P, Pan L, Lu W, Xiong J, Zhang M, Zhang W, Li L, Wen Z. 2014. IL-1beta and  
518 reactive oxygen species differentially regulate neutrophil directional migration and Basal random  
519 motility in a zebrafish injury-induced inflammation model. *J Immunol* 192:5998-6008.
- 520 45. Angosto D, López-Castejón G, López-Muñoz A, Sepulcre MP, Arizcun M, Meseguer J, Mulero V.  
521 2012. Evolution of inflammasome functions in vertebrates: Inflammasome and caspase-1 trigger  
522 fish macrophage cell death but are dispensable for the processing of IL-1 $\beta$ . *Innate Immun*  
523 18:815-824.
- 524

## 525 **Figure legends**

526 **FIG 1** Macrophages and neutrophils are critical for *E. piscicida* infection. (A) Scheme  
527 showing the experimental procedure used for the assays of survival rate and bacterial  
528 burden. 3-dpf larvae were microinjected with bacteria at the vein tail muscle and  
529 survival rate and bacterial burden were determined at the indicated time points. (B)  
530 Indicated doses of wild type *E. piscicida* were microinjected into the tail vein muscle  
531 of 3-dpf zebrafish larvae, and the survival rate was calculated at indicated days post  
532 infection. Experiments used 40 larvae per group, and data shown are from 1  
533 experiment representative of 3 independent experiments. (C) 3-dpf larvae were  
534 microinjected with 1 nl suspension of wild type *E. piscicida* (45 cfu/nl) to determine  
535 the bacterial colonization in larvae. Data are presented as mean  $\pm$  SD of 60 larvae  
536 per group, 3 independent experiments were analyzed. (D) *In vivo* imaging of the  
537 bacterial loading at the tail vein muscle. 3-dpf larvae were microinjected with 1 nl  
538 mCherry-labeled wild type *E. piscicida* (45 cfu/nl) at the tail vein muscle. Scale bar  
539 =50  $\mu$ m. (E-G) One-cell stage *Tg* (*mpo:eGFP<sup>+/+</sup>*) embryos were microinjected with 1  
540 nl 0.25 mM *pu.1* morpholino to knockdown macrophages, or 1 nl 0.5 mM *pu.1*  
541 morpholino to knockdown macrophages and neutrophils, respectively, the control  
542 group was microinjected with standard control morpholino. Three days later, the  
543 larvae were microinjected with wild type *E. piscicida*, and the bacterial loading was  
544 analyzed by fluorescence microscope (E), and the survival rate (F) and bacterial  
545 burden (G) were monitored at indicated time points. Images are representative of 3  
546 independent experiments, data are presented as mean  $\pm$  SD, and the differences in  
547 fish survival are analyzed by log-rank (Mantel-Cox) test. \*  $p < 0.05$ .

548 **FIG 2** EvpP inhibits neutrophils recruitment to promote *E. piscicida* infection *in vivo*.

549 3-dpf larvae were microinjected with mCherry-labeled wild type,  $\Delta evpP$ , or  
550  $\Delta evpP::pevpP$  *E. piscicida* at the tail muscle. Survival rate (A) and bacterial burden  
551 (B) were monitored at indicated time points. The recruitment of neutrophils to  
552 infection site was analyzed by fluorescence microscope at 6 and 12 hpi (C), and the  
553 quantification of neutrophil fluorescence intensity were analyzed (D). Images are  
554 representative of 3 independent experiments, data are presented as mean  $\pm$  SD, the  
555 differences in fish survival are analyzed by log-rank (Mantel-Cox) test, \*  $p < 0.05$ , and  
556 the difference between groups are analyzed by student's *t* test, \*  $p < 0.05$ .

557 **FIG 3** EvpP inhibits neutrophils recruitment via Jnk-MAPK signaling *in vivo*. (A)  
558 Quantitative western blot analysis of phosphorylated-JNK (p-JNK) levels of  
559 infected-larvae at 12 hpi with or without treatment of JNK inhibitor SP600125 (50  
560  $\mu$ M). 3-dpf larvae were microinjected with 1 nl PBS, or wild type,  $\Delta evpP$  or  
561  $\Delta evpP::pevpP$  *E. piscicida* (45 cfu/nl); 50 larvae per group were collected for  
562 immunoblotting. Results are representative of 3 independent experiments. (B and C)  
563 RT-PCR analysis of *cxcl8a* and *mmp13* transcription in infected larvae at indicated  
564 timepoints. (D and E) Larva were pretreated with or without 50  $\mu$ M SP600125,  
565 bacterial burden (D) and survival rate (E) of larvae infected with  $\Delta evpP$  were  
566 monitored at the indicated timepoints. (F) Larva were pretreated with or without 50  
567  $\mu$ M SP600125, the neutrophil recruitment to infection site were analyzed by  
568 fluorescence microscope. Images are representative of 3 independent experiments,  
569 data are presented as mean  $\pm$  SD, the differences in fish survival are analyzed by  
570 log-rank (Mantel-Cox) test, \*  $p < 0.05$ , and the difference between groups are analyzed  
571 by student's *t* test, \*  $p < 0.05$ .

572 **FIG 4** EvpP inhibits neutrophils recruitment through Jnk-caspy-inflammasome



573 cascades *in vivo*. (A) RT-PCR analysis of *IL-1 $\beta$*  transcription in indicated *E. piscicida*  
574 infected larvae at indicated timepoints. (B) Relative caspase-1 activity in indicated *E.*  
575 *piscicida* infected larvae was measured by incubating larva homogenate with  
576 fluorogenic and chromogenic substrates of caspase-1 (YVAD). (C) One-cell stage *Tg*  
577 (*mpo:eGFP<sup>+/+</sup>*) embryos were microinjected with 1 nl 0.75 mM *caspy* morpholino to  
578 knockdown *caspy*, or 1 nl 0.5 mM *IL-1 $\beta$*  morpholino to knockdown IL-1 $\beta$ , and the  
579 control group was microinjected with standard control morpholino. Three days later,  
580 larvae were microinjected with mCherry-labeled wild type, or  $\Delta$ *evpP* *E. piscicida*, the  
581 neutrophil recruitment to infection site were analyzed by fluorescence microscope. (D  
582 and E) Enumeration of survival rate (D) and bacterial burden (E) of larvae infected  
583 with wild type *E. piscicida* were monitored at indicated timepoints. (F and G)  
584 Enumeration of survival rate (F) and bacterial burden (G) of larvae infected with  
585  $\Delta$ *evpP* *E. piscicida* were monitored at indicated timepoints. Images are representative  
586 of 3 independent experiments, data are presented as mean  $\pm$  SD, the differences in  
587 fish survival are analyzed by log-rank (Mantel-Cox) test, \*  $p < 0.05$ , and the difference  
588 between groups are analyzed by student's *t* test, \*  $p < 0.05$ .

589 **FIG 5** Summary of the proposed mechanism of EvpP *in vivo*. During *E. piscicida*  
590 replicates in the *E. piscicida*-containing vacuole (ECV) when it enters the cells, the  
591 T6SS effector EvpP could inhibit the phosphorylation of Jnk-MAPK signals, results  
592 into the reduced expression of *cxcl8a* and *mmp13*, which contributes to the neutrophil  
593 recruitment. Meanwhile, the EvpP inhibited Jnk-MAPK signaling could also inhibit  
594 the caspy-inflammasome and IL-1 $\beta$  expression to suppress the neutrophil recruitment,  
595 which promotes the colonization of *E. piscicida* in zebrafish. The proposed model  
596 suggests a critical role for the *E. piscicida* T6SS effector in modulating the function of  
597 immune cells and promoting pathogenesis *in vivo*.

598 **Tan et al. FIG 1**

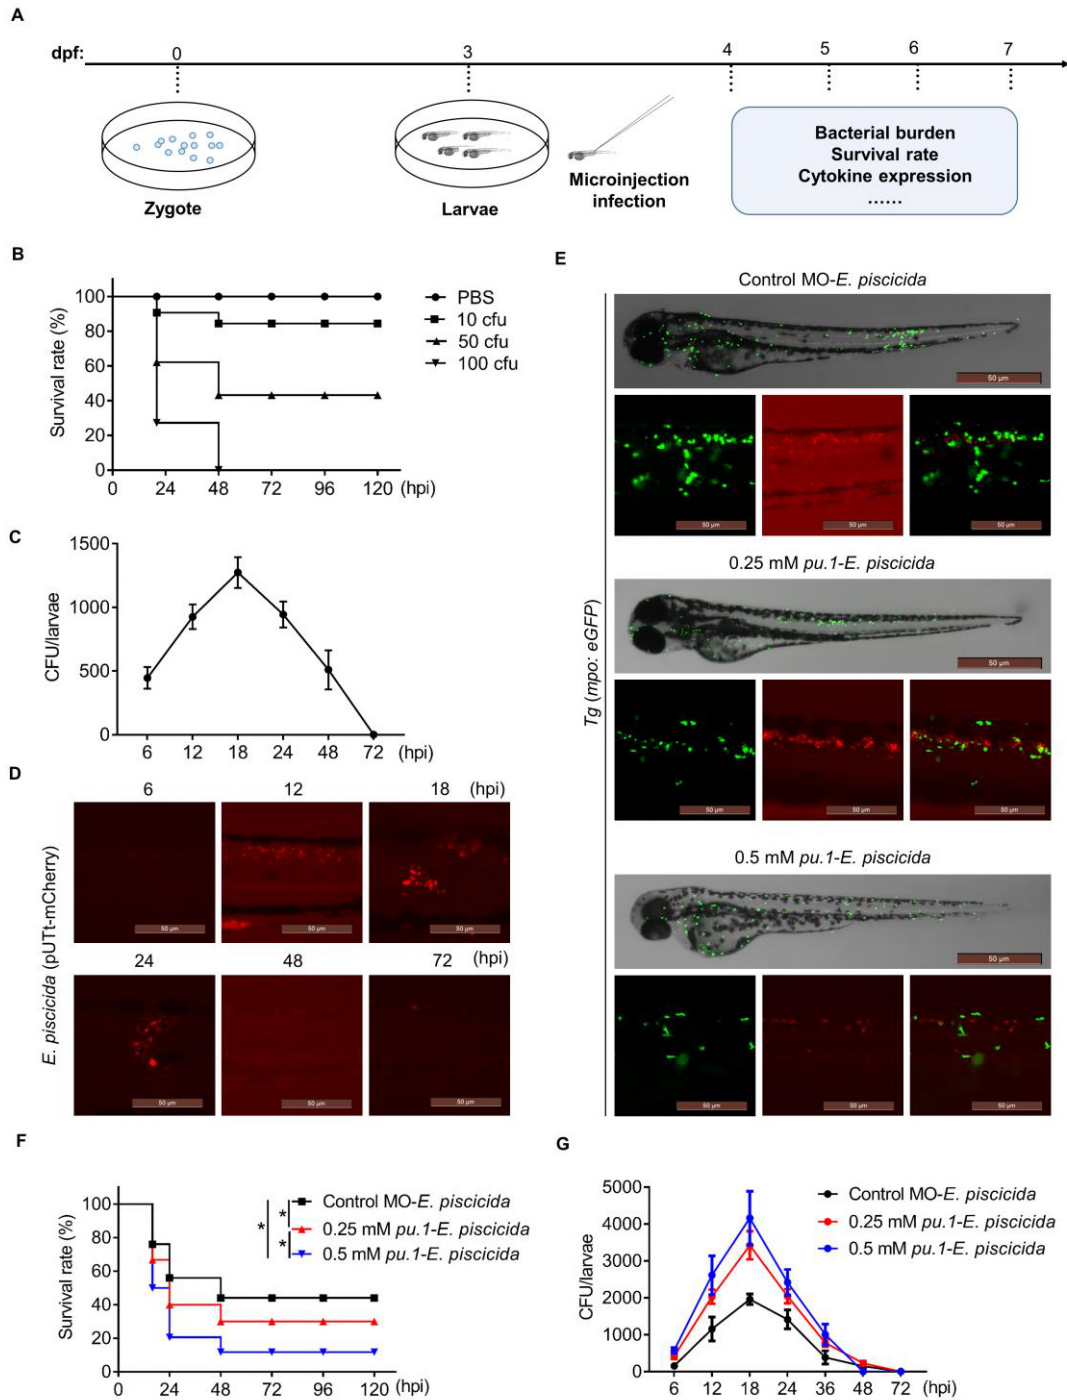

599

600

601 **Tan et al. FIG 2**

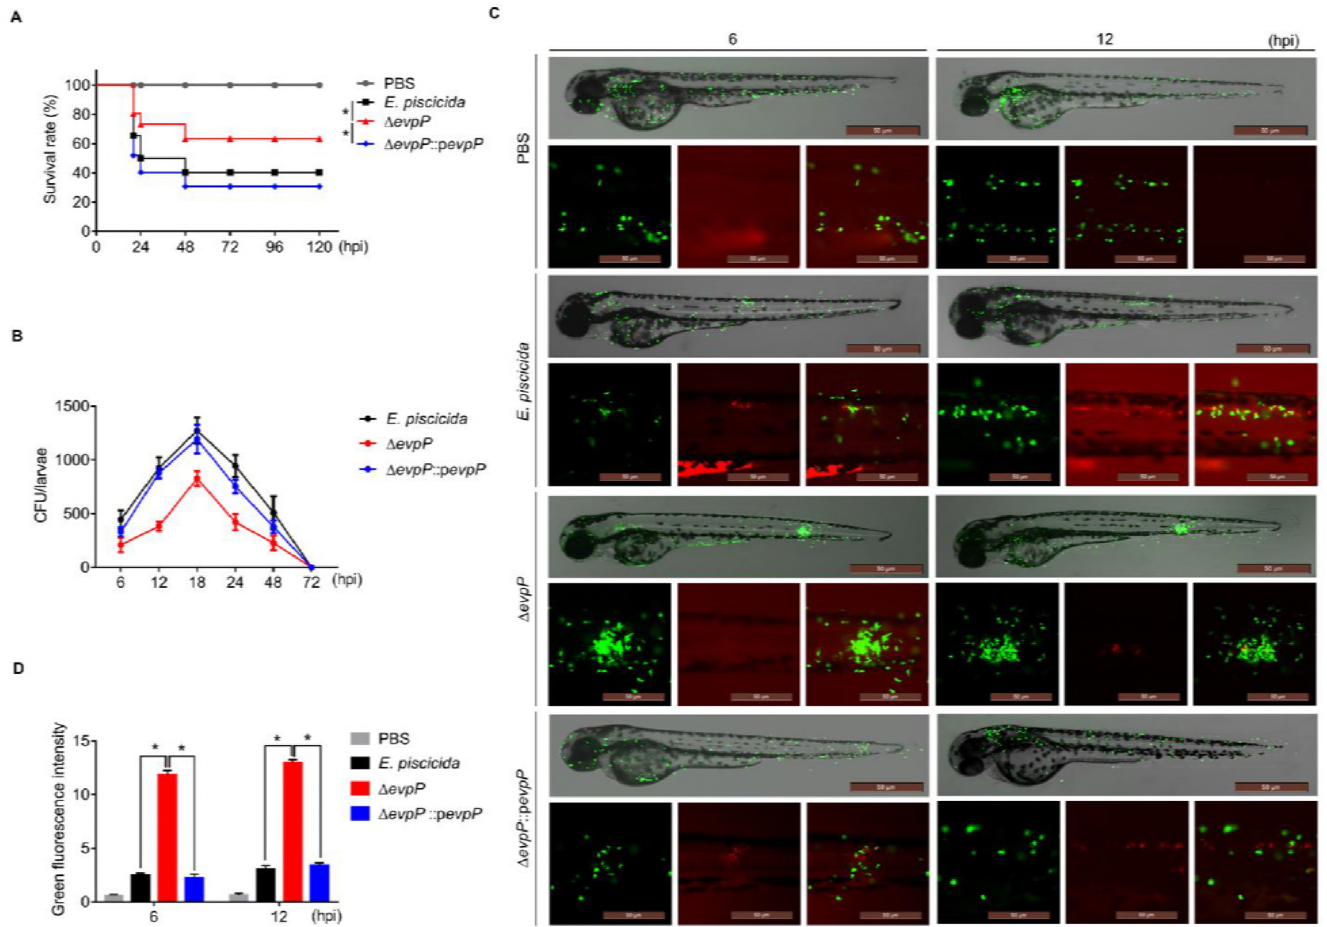

60:  
603

604 **Tan et al. FIG 3**

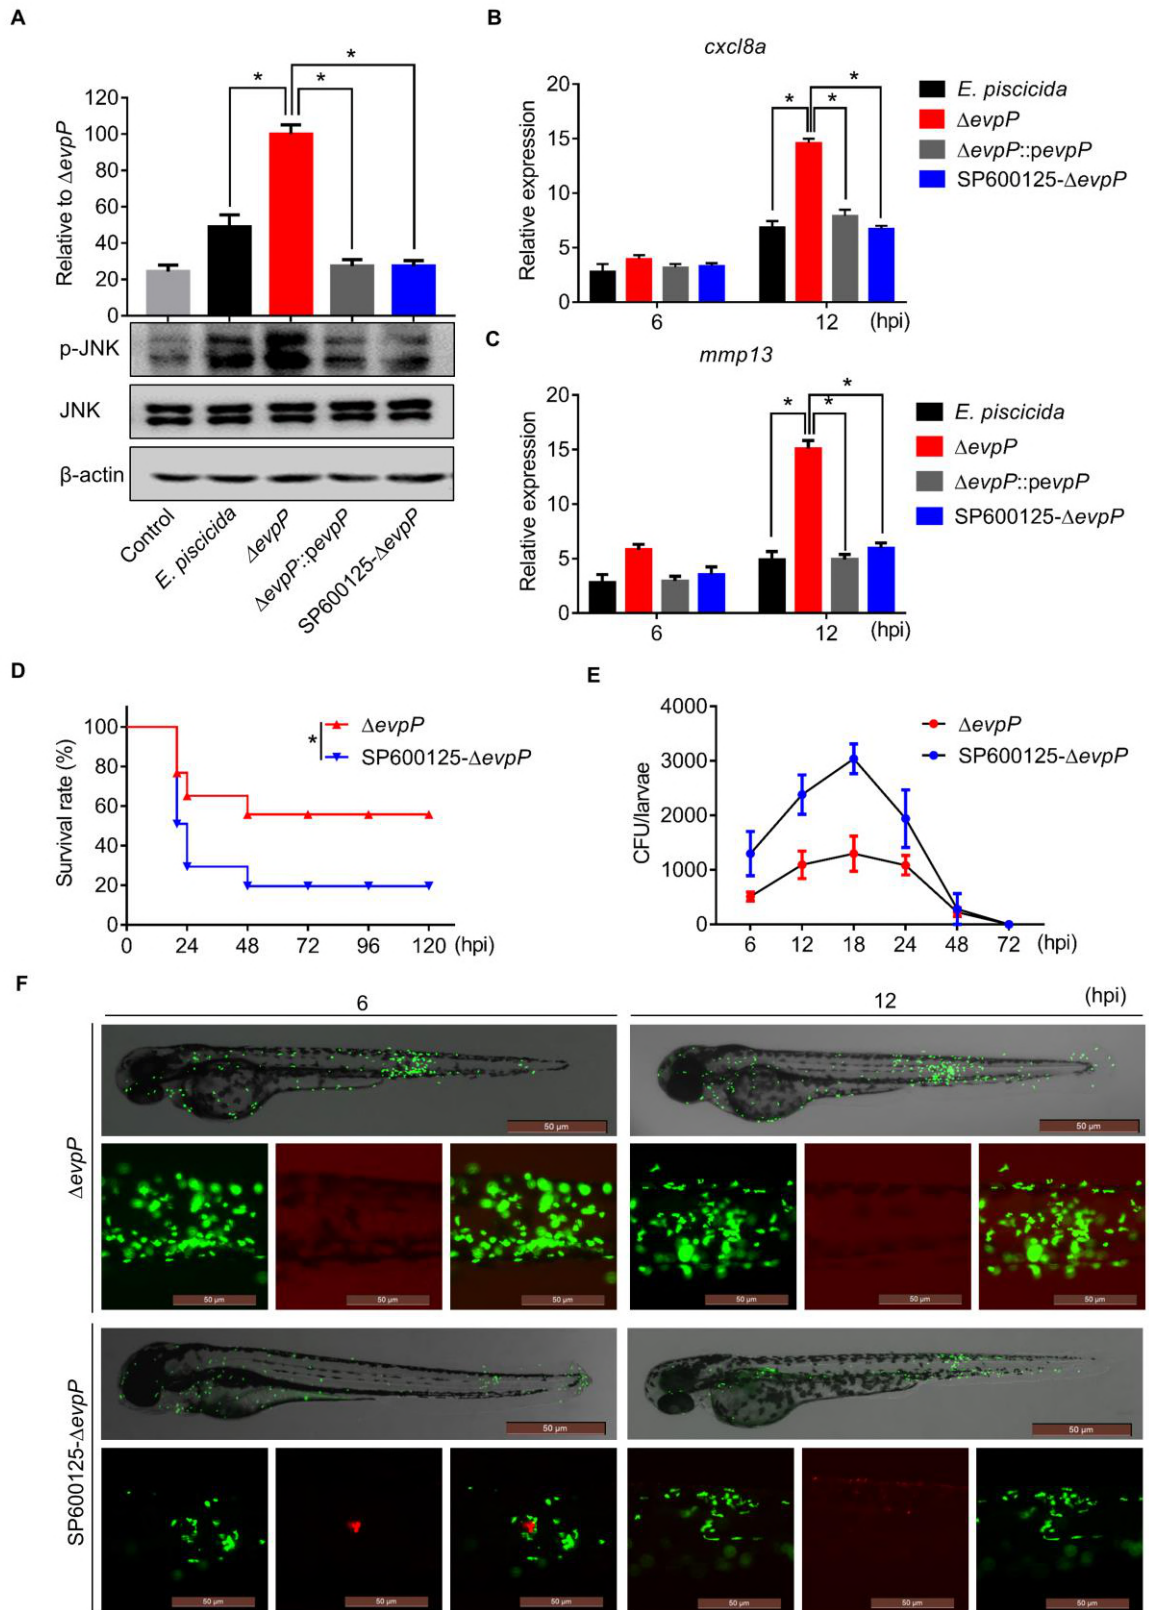

605  
606

607 **Tan et al. FIG 4**

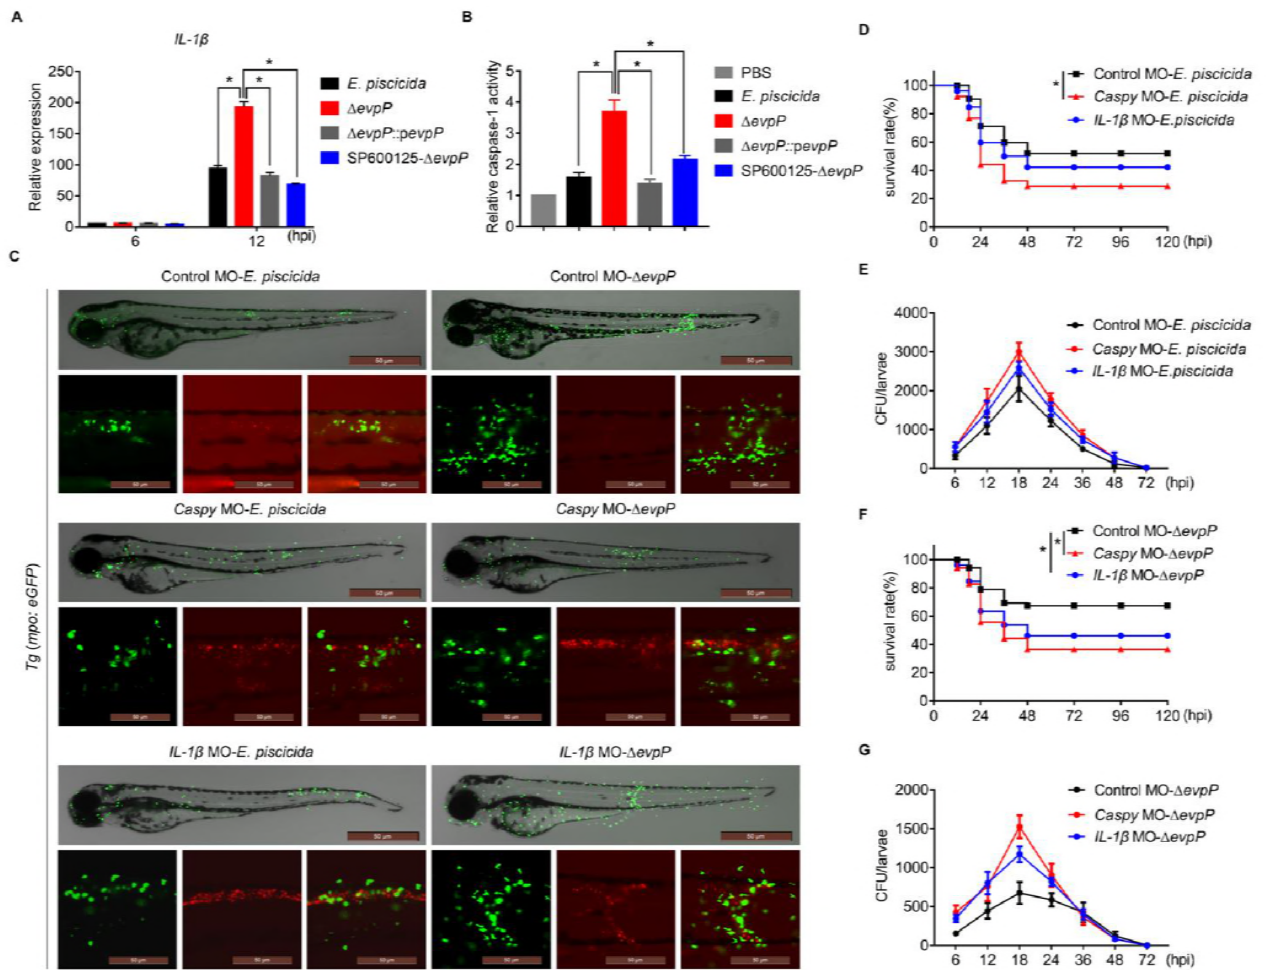

6  
609

610 **Tan et al. FIG 5**

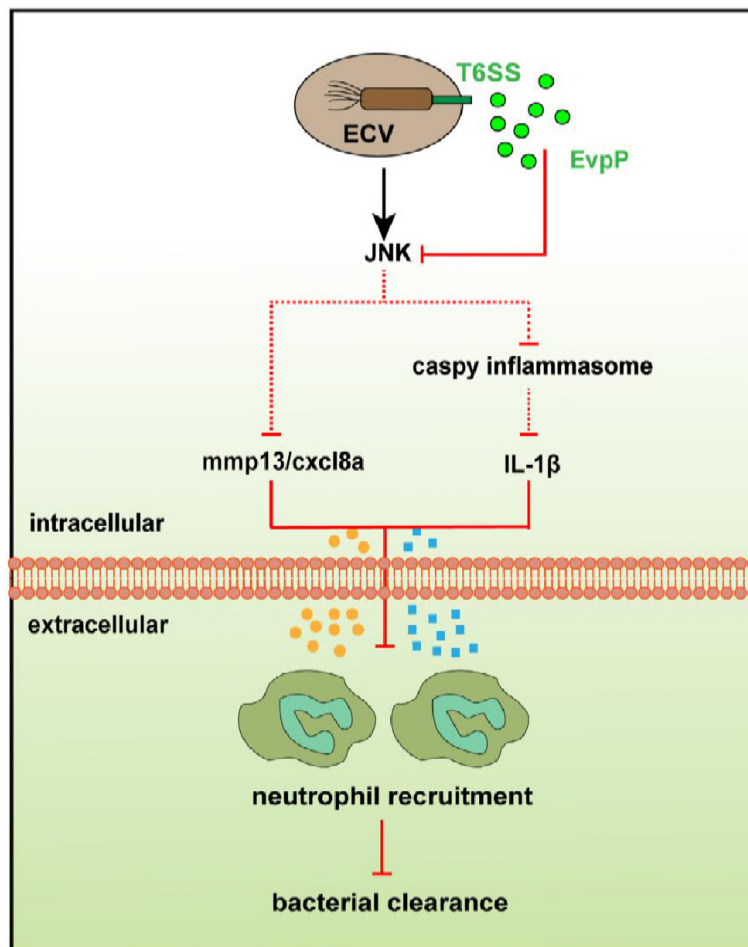

611

612 **Supporting information**

613 **Bacterial T6SS Effector EvpP Inhibits Neutrophil Recruitment via**

614 **JNK- Caspy Inflammasome Signaling *In vivo***

615 Jinchao Tan,<sup>a</sup> Dahai Yang,<sup>a,c</sup> Zhuang Wang,<sup>a</sup> Xin Zheng,<sup>a</sup> Yuanxing Zhang,<sup>a,c</sup> Qin Liu

616 <sup>a,b,c</sup>

617 State Key Laboratory of Bioreactor Engineering, East China University of Science

618 and Technology, Shanghai 200237, China <sup>a</sup>; Laboratory for Marine Biology and

619 Biotechnology, Qingdao National Laboratory for Marine Science and Technology,

620 Qingdao 266071, China <sup>b</sup>; Shanghai Engineering Research Center of Marine Cultured

621 Animal Vaccines, Shanghai 200237, China <sup>c</sup>.

622 Address correspondence to Qin Liu, [qinliu@ecust.edu.cn](mailto:qinliu@ecust.edu.cn).

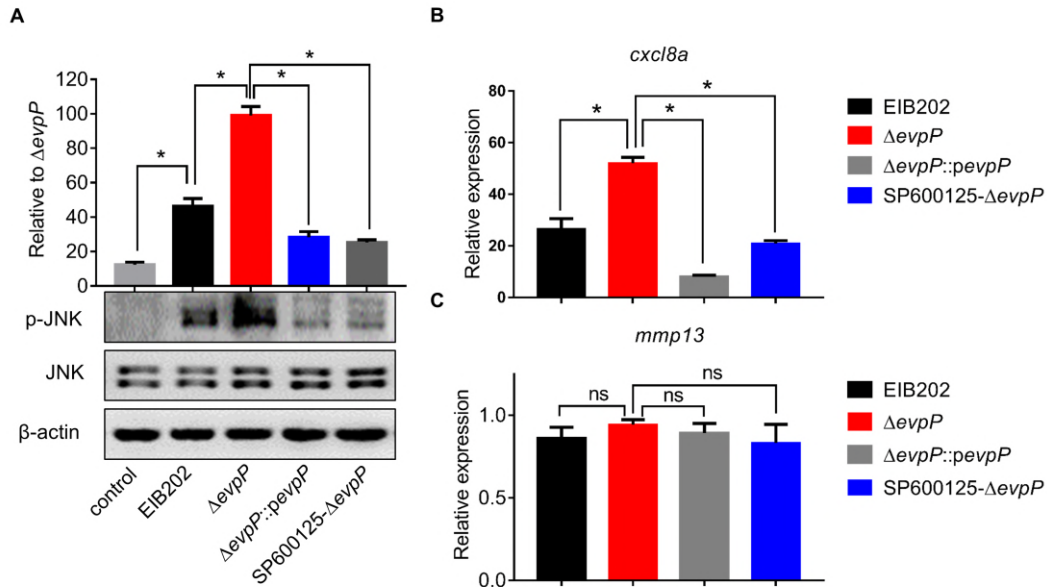

623

624 **FIG S1** Role of EvpP in regulating JNK-MAPK signaling cascades in infected ZF4  
625 cells. ZF4 cells were pretreated with or without DMSO or JNK inhibitor (SP600125,  
626 40 μM, 1 h) and then infected with or without wild type, ΔevpP, or ΔevpP::pevpP *E.*  
627 *piscicida* for 3 h at an MOI of 50. The phosphorylation of JNK (P-JNK) was analyzed  
628 by immunoblotting, and the transcription of *cxcl8a* and *mmp13* was analyzed by  
629 RT-PCR. (A) The phosphorylation of JNK was analyzed by immunoblotting. (B and C)  
630 RT-PCR analysis of *cxcl8a* and *mmp13* transcription in indicated *E. piscicida* infected  
631 ZF4 cells. Data are presented as mean ± SD, the difference between groups are  
632 analyzed by student's *t* test, \*  $p < 0.05$ ; ns = not significant.

633



634

**TABLE S1** Strains and plasmids used in this study

| Strains and plasmids                  | Description                                                                                                                         | References     |
|---------------------------------------|-------------------------------------------------------------------------------------------------------------------------------------|----------------|
| <i>Edwardsiella piscicida</i>         |                                                                                                                                     |                |
| <b>EIB202</b>                         | Wild type, Col <sup>r</sup> , Cm <sup>r</sup>                                                                                       | CCTCC# M208068 |
| <i>ΔevpP</i>                          | EIB202, in-frame deletion of ETAE_2428                                                                                              | 26             |
| <i>ΔevpP::pevpP</i>                   | <i>ΔevpP</i> , complemented with pUTt-0456-ETAE_2428                                                                                | 25             |
| <i>Escherichia coli</i>               |                                                                                                                                     |                |
| <b>DH5α</b>                           | α-Complementation                                                                                                                   | Invitrogen™    |
| <b>Plasmids</b>                       |                                                                                                                                     |                |
| <b>pUTt</b>                           | Promoter screening vector, pUC18 derivative with lac promoter and MCS deleted, and rrnBT1T2 terminator and MCS from pBV220 inserted |                |
| <b>pUTt-p0456-mCherry</b>             | pUTt-pBAD containing fragment of ETAE_0456 promoter and <i>mCherry</i> , Amp <sup>r</sup>                                           | This study     |
| <b>pUTt-p0456-<i>evpP</i></b>         | pUTt-pBAD containing fragment of ETAE_0456 promoter and <i>evpP</i> -HA fusion, Amp <sup>r</sup>                                    | This study     |
| <b>pUTt-p0456-<i>evpP</i>-mCherry</b> | pUTt-pBAD containing fragment of ETAE_0456 promoter, <i>evpP</i> -HA, and <i>mCherry</i> , Amp <sup>r</sup>                         | This study     |

635

636

**TABLE S2** Primers used in this study

| <b>Primers</b>      | <b>Sequence ( 5' → 3')</b> |
|---------------------|----------------------------|
| <b>z-β-actin-F</b>  | TCGTCCACCGCAAATGCTTCTA     |
| <b>z-β-actin-R</b>  | CCGTCACCTTCACCGTTCCAGT     |
| <b>z-cxcl8a-F</b>   | GTCGCTGCATTGAAACAGAA       |
| <b>z-cxcl8a-R</b>   | CTTAACCCATGGAGCAGAGG       |
| <b>z-mmp13-F</b>    | AATCCTCTTTTCGCCAACAACCAGG  |
| <b>z-mmp13-R</b>    | CTCGGATTCTTCTTCAGGCGGTAAG  |
| <b>z-IL-1beta-F</b> | GCTGGAGATCCAAACGGATA       |
| <b>z-IL-1beta-R</b> | ATACGCGGTGCTGATAAACC       |

637
